# Supplementary material for: PDMS-Based Capacitive Pressure Sensor for Flexible Transparent Electronics
Source: Hindawi journal article supplement (doi:10.1155/2019/1418374), 2019-06-04
Supplement: f1 [file 1418374.f1.pdf]

## Support Information

The corresponding capacitance changing characteristics of PDMS capacitors under 80°C, 110°C, 140°C, 170°C and 200°C annealing temperatures.

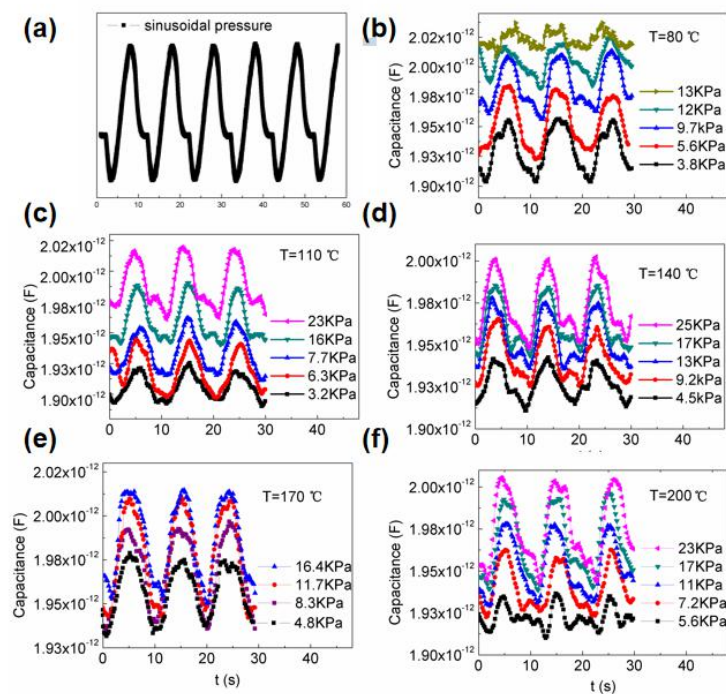

Supplementary Figure S1. (a) The waveform of 0.1 Hz sinusoidal pressure generated by vibration exciter. The corresponding capacitance changing characteristics of PDMS capacitor under (b) 80°C, (c) 110°C, (d) 140°C, (e) 170°C, (f) 200°C.
